# Supplementary material
Source: ML conference proceedings conference paper supplement (https://proceedings.neurips.cc/paper_files/paper/2023/hash/fc0e3f908a2116ba529ad0a1530a3675-Abstract.html)
Supplement: Supplementary file 1 [file fc0e3f908a2116ba529ad0a1530a3675-Supplemental-Conference.zip]

Archive with 2 entries (2 files):
- mpt_lml_neurips_2023_supplementary.pdf
- __MACOSX/._mpt_lml_neurips_2023_supplementary.pdf
